# Supplementary material
Source: Elsevier journal article supplement (https://comptes-rendus.academie-sciences.fr/chimie/article/10.1016/j.crci.2012.06.004/file/attach/mmc1.pdf)

## SUPPLEMENTARY MATERIAL

### **Esterification of acetic acid with n-butanol using vanadium oxides supported on $\gamma$ -alumina**

### **Estérification de l'acide acétique avec le n-butanol en présence d'oxydes de vanadium supportés sur $\gamma$ -alumine**

**Gheorghita Mitran<sup>a</sup> • Éva Makó<sup>b</sup> • Ákos Rédey<sup>c</sup> • Ioan-Cezar Marcu<sup>a,\*</sup>**

<sup>a</sup> Laboratory of Chemical Technology and Catalysis, Department of Organic Chemistry, Biochemistry & Catalysis, Faculty of Chemistry, University of Bucharest, 4-12, Blv. Regina Elisabeta, 030018 Bucharest, Romania

<sup>b</sup> Institute of Materials Engineering, Faculty of Engineering, University of Pannonia, 10 Egyetem St, 8201 Veszprém, Hungary

<sup>c</sup> Department of Environmental Engineering and Chemical Technology, Faculty of Engineering, University of Pannonia, 10 Egyetem St, 8201 Veszprém, Hungary

---

\* Corresponding author. E-mail addresses: ioancezar.marcu@g.unibuc.ro ; ioancezar\_marcu@yahoo.com

**Fig. S1.** SEM micrographs of the vanadium-containing samples before and after the catalytic test: (a) – fresh 5V-Al<sub>2</sub>O<sub>3</sub>; (b) – used 5V-Al<sub>2</sub>O<sub>3</sub>; (c) – fresh 10V-Al<sub>2</sub>O<sub>3</sub>; (d) – used 10V-Al<sub>2</sub>O<sub>3</sub>.

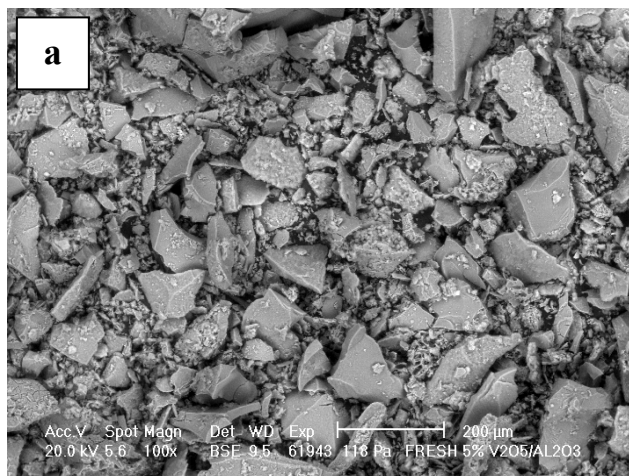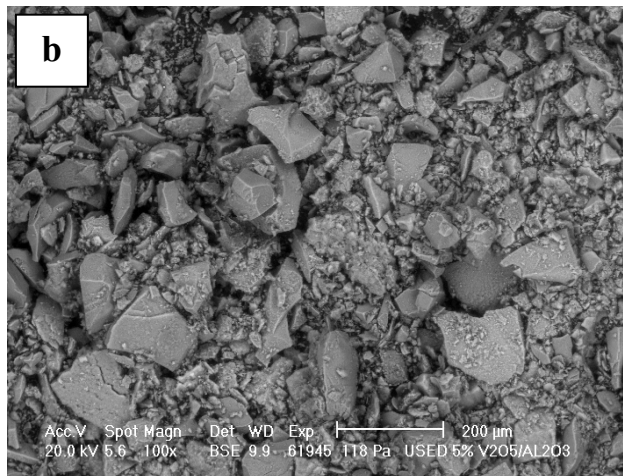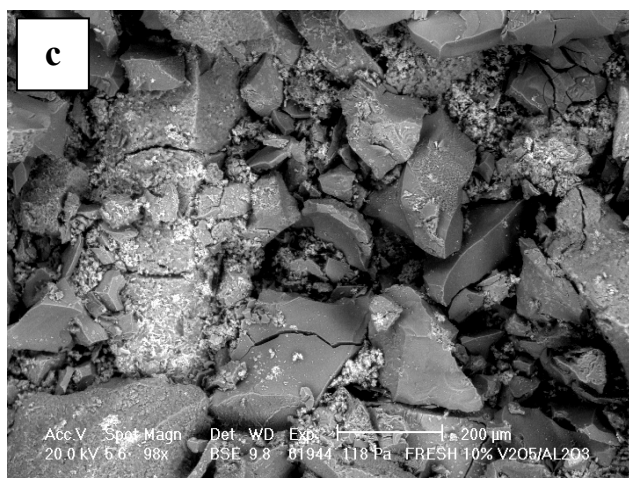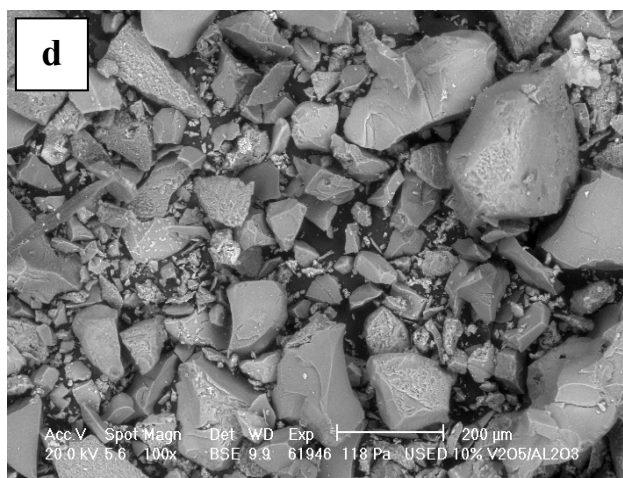

Supplement: mmc1 [file mmc1.pdf]
